# Supplementary material
Source: MDPI journal article supplement (https://www.mdpi.com/2227-9040/10/11/473)
Supplement: s1 [file s1]

# A Novel Synthesis of a Magnetic Porous Imprinted Polymer by Polyol Method Coupled with Electrochemical Biomimetic Sensor for the Detection of Folate in Food Samples

Sabir Khan<sup>1,2</sup>, Ademar Wong<sup>2</sup>, Michael Rychlik<sup>3</sup> and María del Pilar Taboada Sotomayor<sup>2,4,\*</sup>

<sup>1</sup>Department of Natural Sciences, Mathematics, and Statistics, Federal Rural University of the Semi-Arid, Mossoró 59625-900, Brazil

<sup>2</sup>Institute of Chemistry, São Paulo State University (UNESP), Araraquara 14801-970, Brazil

<sup>3</sup>Analytical Food Chemistry, School of Life Sciences, Technical University of Munich, Maximus-von-Imhof-Forum 2, 85354 Freising, Germany

<sup>4</sup>National Institute of Alternative Technologies for Detection, Toxicological Evaluation and Removal of Micropollutants and Radioactives (INCT-DATREM), Araraquara 14801-970, Brazil

\* Correspondence: m.sotomayor@unesp.br

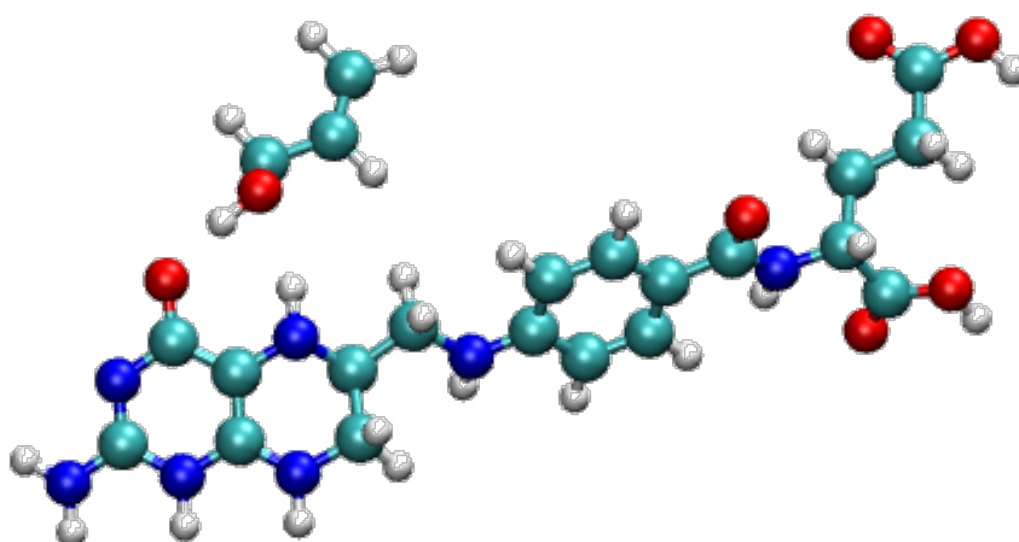

**Figure S1.** (a) Fundamental) three-dimensional structural formula.

→ Fe(III) of acetylacetonate

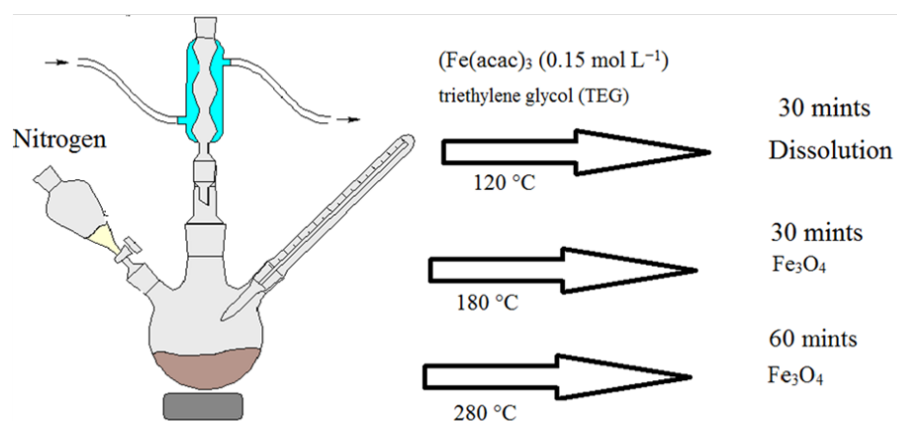

**Figure S2.** Experimental parameters applied in the formation of magnetite nanoparticles prepared by the polyol method.

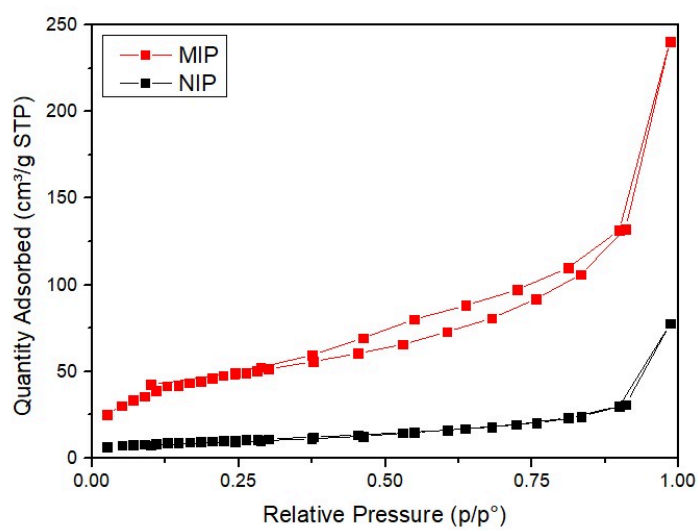

**Figure S3.** The plots about nitrogen adsorption.

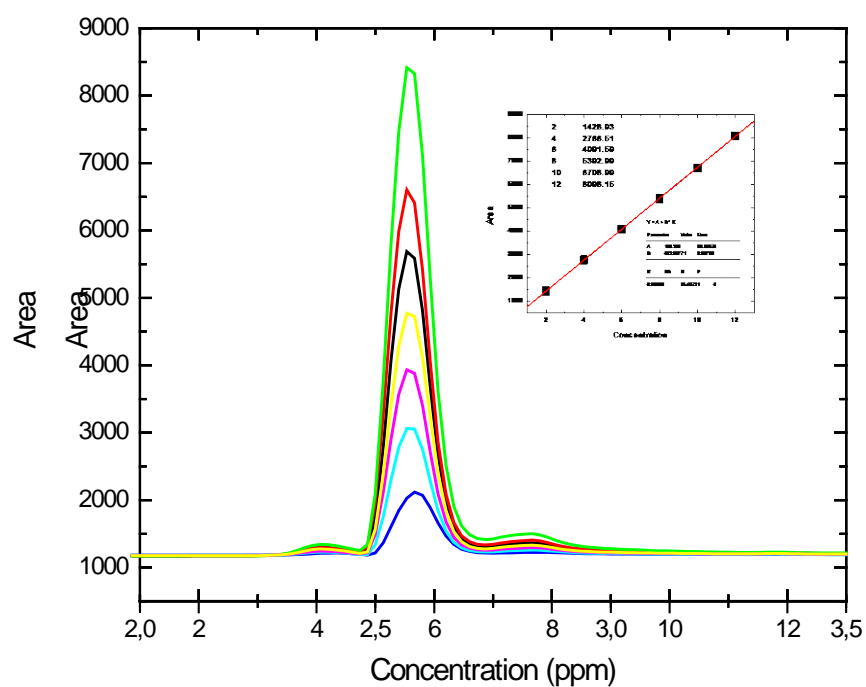

**Figure S4.** Analytical curve obtained from the application of the HPLC-UV method for the determination of different concentrations of folate. Analysis conditions: 0.1% phosphoric acid in a solution containing water and methanol; flow rate of 0.8 mL min<sup>-1</sup>; column temperature of 25 °C; detection wavelength of 280 nm. Gradient elution: 0–7 min.

### Electrochemical profile by cyclic voltammetry

A thorough analysis of the electrochemical performance of the electrodes was conducted by cyclic voltammetry (CV) using carbon paste electrode (CPE), MNIPs/CPE, and MMIPs/CPE in the presence of  $1.1 \times 10^{-5}$  mol L<sup>-1</sup> folate solution. Figure S5 shows the results obtained from this analysis. As can be observed, the MMIPs/CPE sensor exhibited the best electrochemical response, with electrochemical signal 4.0 times greater than that of the MNIPs/CPE sensor and much higher than that of the CPE. The significant increase in the signal of the MMIPs/CPE is attributed to the excellent interaction between the specific cavities (with a high surface area) present in the polymeric material and the analyte in the solution. The outstanding performance of the MMIPs/CPE can thus be linked to its highly selective adsorption of the analyte; the CPE exhibited no such behavior, while the MNIPs/CPE exhibited low adsorption.

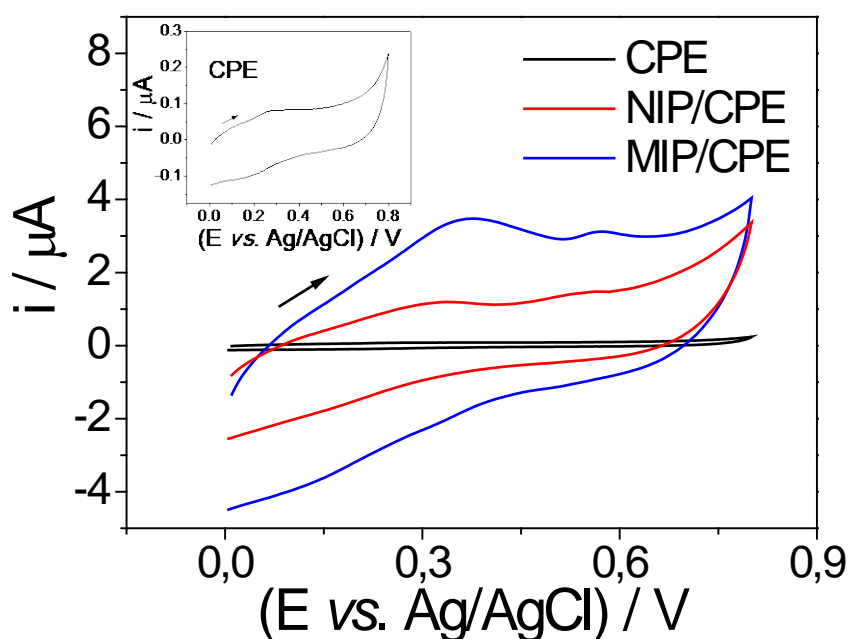

**Figure S5.** Cyclic voltammograms obtained from the application of different electrodes. Measurements were performed using scan rate= 50 mVs<sup>-1</sup>, acetate buffer solution (at pH 4.0) in the presence of  $1.1 \times 10^{-5}$  mol L<sup>-1</sup> folate.

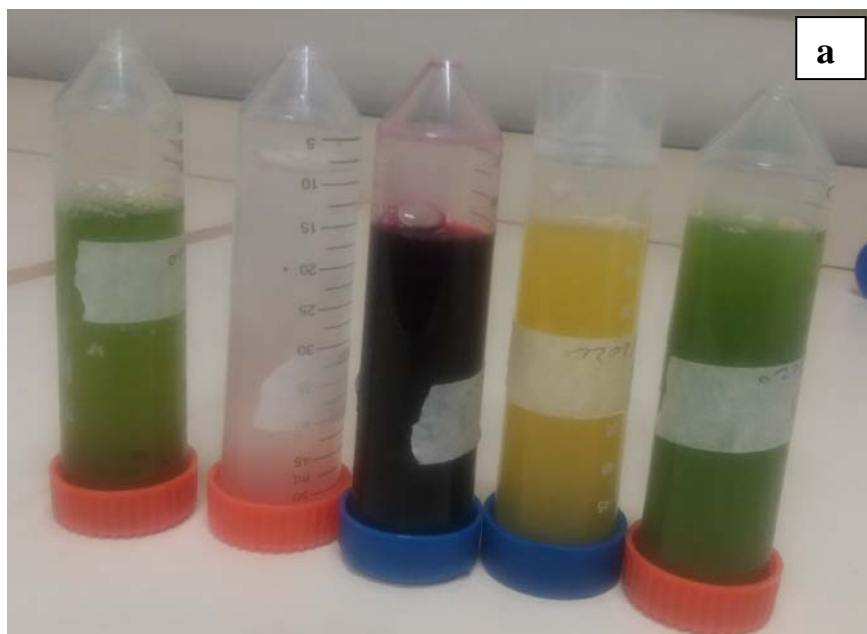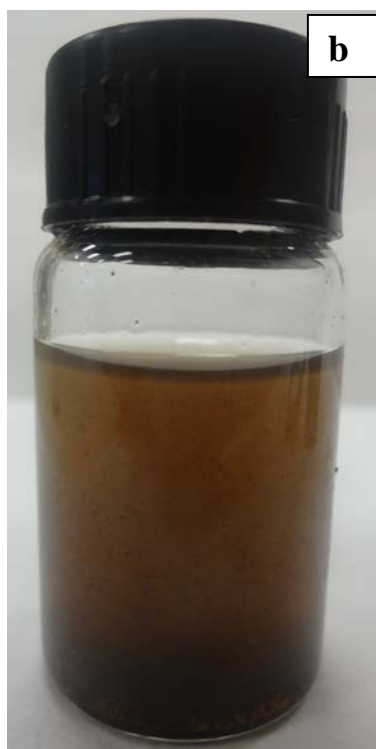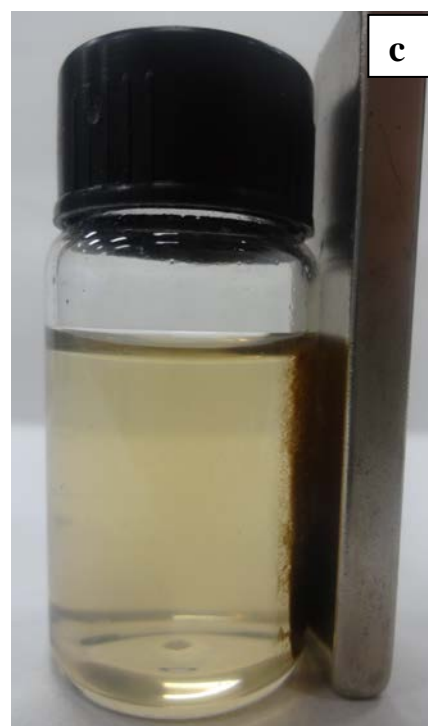

**Figure S6.** Analysis of real samples based on the application of the MIP/CPE sensor using different food samples. (a) Real food samples; (b) MMIPs before magnetic separation; (c) MMIPs after magnetic separation

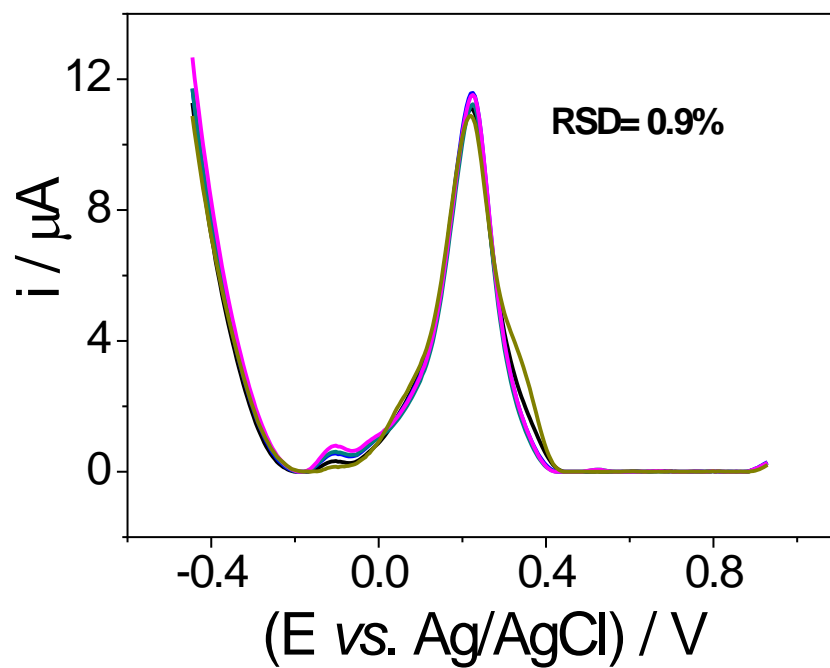

**Figure S7:** Electrochemical determination of folate by SWV using the mag-MIP/CPE sensor. Analysis conditions: 0.1 mol L<sup>-1</sup> acetate buffer solution (pH 4.0). SWV conditions:  $f = 15$  Hz,  $a = 75$  mV,  $\Delta E_s = 5$  mV, and folate concentration =  $2.7 \times 10^{-5}$  mol L<sup>-1</sup>.

**Table S1.** Optimized parameters of SWV for detection of folate

| Parameter      | Range    | Optimum value |
|----------------|----------|---------------|
| Amplitude (mV) | 25 - 100 | 75            |
| Step (mV)      | 2 - 6    | 5             |
| Frequency (Hz) | 8 - 30   | 15            |

**Table S2.** Application of MMIPs for selective extraction of analytes from real samples

|                | Contaminations       | Limit of Detection                                                                    | Matrix                                               | Ref |
|----------------|----------------------|---------------------------------------------------------------------------------------|------------------------------------------------------|-----|
|                | linear dynamic range |                                                                                       |                                                      |     |
| <b>Analyte</b> | Folic acid           | 10nM,<br>0.01 $\mu$ M-100 $\mu$ M                                                     | Human serum                                          | [1] |
|                | Folic acid           | $2.7 \times 10^{-8}$ M<br>$6 \times 10^{-8} - 8 \times 10^{-5}$ M                     | Biological specimens                                 | [2] |
|                | Folic acid           | 0.01 $\mu$ M<br>0.05–1.5 $\mu$ M                                                      | Fortified food and pharmaceutical samples            | [3] |
|                | Folic acid           | 0.05 $\mu$ M<br>0.08 to 650 $\mu$ M                                                   | vitamin B9 tablets<br>Mint leaves                    | [4] |
|                | Folic acid           | $2.40 \pm 0.9) \times 10^{-9}$ M<br>$5.0 \times 10^{-7}$ to<br>$9.0 \times 10^{-6}$ M | fruit juices, human blood serum, and pharmaceuticals | [5] |

## References

1. Chekin, F.; Teodorescu, F.; Coffinier, Y.; Pan, G.H.; Barras, A.; Boukherroub, R.; Szunerits, S. MoS<sub>2</sub>/Reduced Graphene Oxide as Active Hybrid Material for the Electrochemical Detection of Folic Acid in Human Serum. *Biosens. Bioelectron.* **2016**, *85*, 807–813.
2. Arvand, M.; Dehsaraei, M. A Simple and Efficient Electrochemical Sensor for Folic Acid Determination in Human Blood Plasma Based on Gold Nanoparticles–Modified Carbon Paste Electrode. *Mater. Sci. Eng. C* **2013**, *33*, 3474–3480.
3. Taherkhani, A.; Jamali, T.; Hadadzadeh, H.; Karimi-Maleh, H.; Beitollahi, H.; Taghavi, M.; Karimi, F. ZnO Nanoparticle-Modified Ionic Liquid-Carbon Paste Electrode for Voltammetric Determination of Folic Acid in Food and Pharmaceutical Samples. *Ionics* **2014**, *20*, 421–429.
4. Khaleghi, F.; Irai, A.E.; Sadeghi, R.; Gupta, V.K.; Wen, Y.P. A Fast Strategy for Determination of Vitamin B9 in Food and Pharmaceutical Samples Using an Ionic Liquid-Modified Nanostructure Voltammetric Sensor. *Sensors* **2016**, *16*, 747.
5. D'Souza, O.J.; Mascarenhas, R.J.; Satpati, A.K.; Dettriche, S.; Mekhalif, Z.; Delhalle, J. High Electrocatalytic Oxidation of Folic Acid at Carbon Paste Electrode Bulk Modified with Iron Nanoparticle-Decorated Multiwalled Carbon Nanotubes and Its Application in Food and Pharmaceutical Analysis. *Ionics* **2017**, *23*, 201–212.
